# Supplementary material for: Economic Burden and distribution of Household Expenditures on Snakebites: Assessing Catastrophic Health Expenditures and Financial Hardship in Rural Uganda
Source: Research Square preprint supplement (doi:10.21203/rs.3.rs-7653113/v1), 2025-10-13
Supplement: Supplementary file 1 [file 85d356fcfd6ceba0439c6617.docx]

**Supplementary material for Economic Burden and Equity in Healthcare Expenditures for Snakebite Treatment: Assessing Catastrophic Health Expenditures and Financial Hardship in Low-Resource.**

**Catastrophic Health Expenditures and Financial Hardship in Rural Uganda**

Michael Muhoozi1,2,3, Simon Kasasa1, Joan Tusabe1, Gati Wambura3, Paul Mukama Ategyeka1, Phionah Atukunda4, Ndyomugyenyi Donald Bruce2, John Alinda Vianney1, Dan Kajungu2

**Institutions**

**1** **Makerere University, School of Public Health, Kampala, Uganda**

**2 Makerere University Center for Health and Population Research, Kampala, Uganda**

**3 Virginia Commonwealth University, School of Public Health, Richmond, Virginia, USA**

**4 Virginia Tech, Department of Population Health Sciences, Blacksburg, Virginia, USA**

**Corresponding author**

Michael Muhoozi

Virginia Commonwealth University, School of Public Health, Richmond, Virginia, USA

Email : [muhoozimusi@gmail.com](mailto:muhoozimusi@gmail.com)

Telephone : +256 780 982 637 /+1 804 903-4075

**Conceptual Framework**

The costs associated with snakebites envenoming were assessed using the Donabedian model, assessing the inputs, processes, outputs and outcomes of the snakebite’s events. These were detailed to help generate costs from each of the line items. These costs occurred at two different levels; i.e., institutional (occur with the health system setting) and non-institutional levels (outside the health system setting). At inputs level, capital costs, overhead costs and re-current costs were incurred and captured at institutional level. Non-institutional input costs included: traditional remedies costs (herbs), materials for home care (clothes/tourniquet) and treatment materials and products from informal sector (painkillers).

At process level, costs of diagnosis, treatment, preventive care and patient education were incurred and captured at institutional levels; while costs of traditional treatment, homecare (tepid sponging/ tourniquet application), informal treatment: (self-medication) and receiving no treatment were incurred at non-institutional level.

At outputs level, costs of diagnosis results, hospitalization, improved knowledge, attitudes and practices were encountered within the institutional setting while cost of traditional treatment service and homecare service occurred in a non-institutional setting.

The inputs that were used in order to carry out activities and processes for management of a snakebite envenoming event. These activities and processes led to services or products delivered; which are the outputs. The outputs to brought about change; outcomes. At outcomes level, health-related quality of life, increase in life years, changes to health status, increased behavior knowledge and patient satisfaction are realized.

This framework guided data collection and extraction of inputs to estimate the burden of snakebites envenoming. Institutional costs of a snakebites envenoming were acquired from interviewing responsible health workers and health facility accountants and inventory managers. These were categorized into capital/fixed costs, overhead costs and recurrent costs. Non-institutional costs of snakebites envenoming were collected from snakebites victims and the identified non-informal structures where they seek treatment. See Table 1.

**Supplementary Table S1: Allocation methodologies for costs included in the study**

| **Category** | **Institutional (Health System Setting)** | **Non-Institutional (Outside Health System)** |
| --- | --- | --- |
| Environment | - Health facilities  - Infrastructure  - Equipment | - Community settings  - Traditional healers  - Home care settings |
| Health System Structure | - Capital costs (infrastructure, equipment)  - Overhead costs  - Recurrent costs (salaries, utilities, supplies) | - Traditional remedies costs (herbs)  - Materials for home care (clothes, tourniquet)  - Informal treatment products (painkillers) |
| Processes | - Diagnosis  - Treatment  - Preventive care  - Patient education | - Traditional treatment  - Homecare (tepid sponging, tourniquet application)  - Informal treatment (self-medication)  - No treatment received |
| Outcomes | - Diagnosis results  - Hospitalization  - Improved knowledge, attitudes, and practices  - Health-related quality of life  - Increased life years  - Changes in health status  - Increased behavior knowledge  - Patient satisfaction | - Traditional treatment services  - Homecare services |

**Figure 1: Regional Map illustrating the districts selected in Eastern Uganda**


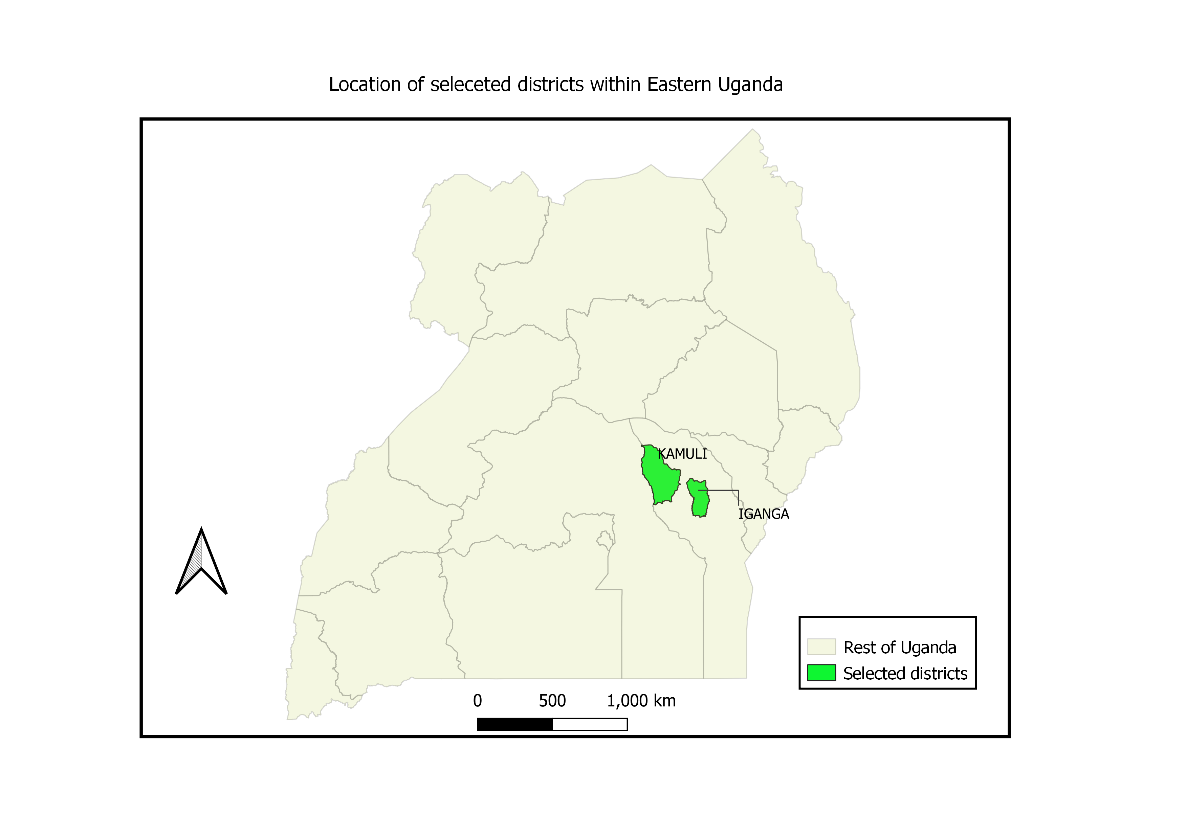


**Supplementary Table S1: Allocation methodologies for costs included in the snakebite study**

| **No.** | **Cost Item** | **Allocation Methodology** |
| --- | --- | --- |
| **Capital Costs** | | |
| 1 | Vehicles | Number × replacement price by type × % use for snakebite case management and outreach |
| 2 | Buildings | m² × cost/m² × % of facility space allocated to snakebite treatment and care |
| 3 | Computers and office equipment | Discounted annual value of computers and office supplies used in documentation, monitoring, and evaluation related to snakebite management |
| 4 | Initial training | Number of participants × number of days × unit cost of training × discount factor (based on useful life and 3% discount rate) |
| **Overhead Costs** | | |
| 5 | Electricity | Kilowatts × cost/kW × % of facility electricity attributed to snakebite care areas (based on apportionment from facility records) |
| 6 | Water | Liters × cost/liter × % of facility water used in snakebite treatment areas (based on consultations and apportionment) |
| 7 | Security | Security staff hours × cost/hour × % allocated to snakebite care units (estimated via apportionment) |
| 8 | Telephone/airtime | Minutes × cost/minute × number of days × number of staff × % allocation to snakebite-related calls or communications |
| **Recurrent Costs** | | |
| 9 | Salary | Gross salary and benefits × % of time staff spent managing snakebite cases, including treatment, documentation, and supervision |
| 10 | Volunteer labor (e.g. VHTs or CHWs) | Estimated market value of volunteer time spent in snakebite case reporting, referral, and community engagement |
| 11 | Per diem/SDA | Number of travel days × per diem rate × number of staff involved in snakebite-related activities (e.g. training, outreach, referral support) |
| 12 | Transportation | Number of field/study days × transport cost per day × number of personnel deployed for snakebite activities |
| 13 | Record Keeping | Staff time and supplies spent on snakebite data entry, treatment documentation, patient follow-up records |
| 14 | Social Mobilization | Time and resources used in community awareness and education about snakebite prevention and treatment-seeking behavior (allocated % of total social mobilization budget) |
| 15 | Waste Management | Sq.m² × cost/Sq.m² × % of biomedical waste attributed to snakebite case treatment (e.g., antivenom vials, gloves, IV lines) |
| **Patient-Specific Costs** | | |
| 16 | Medications and drug costs | Average cost of antivenoms, pain medications, antibiotics, and supportive treatment per snakebite case |
| 17 | Hospitalization/bed costs | Number of inpatient days × cost per hospital day per snakebite case |
| 18 | Travel costs | Round-trip transport costs incurred by patients and caregivers to and from health facilities for snakebite treatment |
| 19 | Meal and food costs | Meals for patients and caregivers during hospitalization for snakebite treatment |
| 20 | Loss of productivity | Human Capital Approach: Days unable to work due to snakebite × average daily wage |
| 21 | Other non-medical costs | Costs for alternative treatments, traditional healers, home-based care supplies, or informal payments/tokens of appreciation |

**Supplementary Table S2: Other Socio-economic and demographic characteristics**

A total of 150 participants participated in the study. The primary occupation of the household head varied, with farming being the most common occupation (42.7%), followed by sales and services (28.7%), professionals (22.0%), manual labor (4.0%), and others, such as motorcycle riders (2.6%). For the secondary occupation of the household head, 40.0% had no secondary occupation, followed by farming (22.7%), manual labor (19.3%), sales and services (12.7%), and professionals (5.3%).

The top three sources of income for the participants were earnings (96.6%), donations (2.7%), and savings (1.7%). The Poorest category had the highest number of households (31.3%) and the Wealthiest category having the lowest (9.3%). The percentage of households within each category shows that the poorest and poor categories represent the majority of households, while the Middle, Wealthy, and Wealthiest categories represent a smaller percentage. Regarding the number of household members, the more than half of households had 3-5 members (52.0%), followed by 6-10 members (32.7%). The sources of water for the participants were public tap (90.7%), piped water/water supply (8.0%), and surface water from pond/lake/river (1.3%). Pit latrine was used by majority as their toilet type (96.6%), followed by pit latrine with slab (2.7%) and flush to pit latrine (0.7%). Most (75.3%) of participants used wood (40.6%) and charcoal wood (34.7%) as their cooking fuel, while a few used charcoals (24.0%) and electricity (0.7%). Majority of participants used iron sheets (98.0%) as roofing material, while a few used grasses thatched (0.7%) or other materials (1.3%). Finally, the most of participants had a cement or concrete floor (70.0%), while a few had a cement or concrete earth or sand floor (3.3%) or an earth or sand floor (26.7%). See Table S2.

**Table S2: Other Socio-economic and demographic characteristics**

| **Characteristics** | **Frequency (n=150)** | **Percentage (%)** |
| --- | --- | --- |
| **Primary occupation of the household head** | | |
| Farming  Professional  Sales and services  Manual labour  Others | 64  33  43  6  4 | 42.7  22.0  28.7  4.0  2.6 |
| **Secondary occupation of the household head** | | |
| None  Farming  Professionals  Sales and services  Manual labour | 60  34  8  19  29 | 40.0  22.7  5.3  12.7  19.3 |
| **Monthly household wealth index** | | |
| Poorest  Poor  Middle  Wealthy  Wealthiest | 47  41  12  36  12 | 31.3  27.3  8.0  24.0  9.3 |
| **Top most sources of income** | | |
| Earnings  Donations  Savings | 145  4  1 | 96.6  2.7  1.7 |
| **Sources of water** | | |
| Piped water/water supply  Public tap  Surface water from pond/lake/river | 12  136  2 | 8.0  90.7  1.3 |
| **Type of toilet used** | | |
| Pit latrine  Pit latrine with slab  Flush to pit latrine | 145  4  1 | 96.6  2.7  0.7 |
| **Type of cooking fuel** | | |
| Wood  Charcoal wood  Charcoal  Electricity | 61  52  36  1 | 40.6  34.7  24.0  0.7 |
| **Roofing materials used** | | |
| Iron sheets  Grass thatched  Others | 147  1  2 | 98.0  0.7  1.3 |
| **Type of floor used** | | |
| Cement or concrete  Cement or concrete earth or sand  Earth or sand | 105  5  40 | 70.0  3.3  26.7 |

****Others include working as motorcycle riders***

**Supplementary Table S3: Characteristics of snakebite victims**

Regarding the age of the victims, the majority were between 20 and 49 years old, with 32.0% being aged 30-39 years. (23.3%) were 50 years old or above. In terms of gender, more than half of the victims were male (54.7%). The snakebite event occurred most frequently on the leg (81.3%), and the majority of the victims sought traditional treatment or visited a herbalist (80.7%).

All victims survived the snakebite event. Snake identification was possible in 77.3% of cases, with small or big black snakes being the most frequently identified (38.8% and 47.4%, respectively). More than of the victims did not seek biomedical treatment or visit a hospital (63.3%). Regarding the time of the snakebite occurrence, it was fairly evenly distributed throughout the day, with the morning and night having slightly higher frequencies (31.3% and 30%, respectively).

In terms of the location of the snakebite event, some occurred in or around the home (42%, including 30% in the home compound, veranda, or toilet and 12.7% inside the house), followed by the garden (33.3%) and along the way (19.3%). Finally, more than half of the snakes were not killed following the snakebite event (59.3%). See table 2.

**Table S3:** **Characteristics of snakebite victims**

| **Characteristics of snakebite victims** | **Frequency (N=150)** | **Percentage** |
| --- | --- | --- |
| **Current age of the victim**  **Mean age: 38.2 years (SD: 14.4 years)**  Less than 20 years  20-29 years  30-39 years  40-49 years  50 years and above | 14  22  48  31  30 | 9.3  14.7  32.0  20.7  23.3 |
| **Sex**  Male  Female | 82  68 | 54.7  45.3 |
| **Victim’s age during the snake bite event**  Less than 20 years  20-29 years  30-39 years  40-49 years  50-59 years  60 years and above | 17  27  44  31  23  8 | 11.3  18.0  29.3  20.7  15.3  5.3 |
| **Severity of the snakebite event**  Non-severe  Non-severe (OPD)  Severe (IPD) | 137  11  2 | 91.3  7.3  1.4 |
| **Hospital visit type**  Outpatient  In-patient | 133  17 | 88.7  11.3 |
| **Snake bite location**  Arm  Hand  Leg | 17  11  122 | 11.3  7.4  81.3 |
| **Place of snakebite event**  Home (compound, veranda, toilet)  Home (In the house)  Along the way  Garden  School | 45  19  29  50  07 | 30.0  12.7  19.3  33.3  4.7 |
| **Time of snakebite occurrence**  Morning  Noon  Evening  Night | 47  21  37  45 | 31.3  14.0  24.7  30.0 |
| **Identification of the snake**  Identified  Not identified | 116  34 | 77.3  22.7 |
| **Characteristics of the identified snake (n=116)**  Big black snake  Small black snake  Green snake | 45  55  16 | 38.8  47.4  13.8 |
| **Killing of the snake following a bite event**  Snake was killed  Snake was not killed | 61  89 | 40.7  59.3 |
| **Use of biomedical treatment/visited hospital**  Yes  No | 55  95 | 36.7  63.3 |
| **Use of traditional treatment/ visited herbalist**  Yes  No | 121  29 | 80.7  19.3 |

**Common first aid methods used after a snakebite event**

Figure 2 shows the frequency of first aid methods used following a snakebite event. The most commonly used method was the application of a tourniquet (143), followed closely by the application of a black stone to the affected area (141). Applying local herbs to the affected area was also a common practice (93). However, making small cuts around the affected area and giving local herbs to chew were used less frequently (41 and 15, respectively). Additionally, a few participants used unconventional methods such as applying a 500 shillings coin and burning the affected area (10).

**Figure 2: The common first aid methods used after a snakebite event**

**Sources of first aid for the snake bite victims**

In the study, the sources of first aid for snakebite victims were assessed. More than half of victims (56%) received first aid from a family member. Self-administered first aid was the second most common source (23.3%). Friends or neighbors provided first aid to 17.3% of the victims. Only a small proportion of victims (3.3%) received first aid from a herbalist. See Figure 3.

**Figure 3: Sources of first aid for the snake bite victims**

**Total treatment costs, productivity losses and hospital costs**

The total treatment costs, productivity losses, and hospital costs of snakebites were calculated for all the participants. The median total treatment cost was 66,000 UGX, with the 25th percentile at 30,000 UGX and the 75th percentile at 195,000 UGX, resulting in an interquartile range (IQR) of 165,000 UGX. The median total productivity losses due to the snakebite were 55,000 UGX, with the 25th percentile at 27,000 UGX and the 75th percentile at 95,000 UGX, resulting in an IQR of 68,000 UGX. The median hospital cost for those who went to the hospital and spent money was 130,000 UGX, with the 25th percentile at 85,000 UGX and the 75th percentile at 235,000 UGX, resulting in an IQR of 150,000 UGX. These figures indicate the range of costs incurred by individuals who suffered from snakebites, with significant variability in the amounts spent across individuals. See Table S4.

**Table S4: Summary of** **total treatment costs, productivity losses and hospital costs**

| **Total treatment costs** | |
| --- | --- |
| Median | 66000 |
| 25th percentile | 30000 |
| 75th percentile | 195000 |
| IQR | 165000 |
| **Total productivity losses** | |
| Median | 55000 |
| 25th percentile | 27000 |
| 75th percentile | 95000 |
| IQR | 68000 |
| **Total hospital costs (for only those who went to the hospital and spent money)** | |
| Median | 130000 |
| 25th percentile | 85000 |
| 75th percentile | 235000 |
| IQR | 150000 |

## **Differences in treatment costs and productivity losses for snakebites envenoming by patient socio-demographic and economic characteristics**

The economic and social impact of snakebite envenoming can vary across different patient groups. In this study, we analyzed the differences in treatment costs and productivity losses for snakebite envenoming among different socio-demographic and economic characteristics of patients.

**Differences in productivity losses for snakebites envenoming by patient socio-demographic and economic characteristics**

The study showed that there were significant differences in productivity losses among snakebite envenoming patients based on age (p-value=0.003), occupation(p-value=0.02), social economic status(p-value=0.02) and type of hospital visit (p-value=0.002). Patients aged 30-39 and those who were hospitalized had the highest productivity losses, while farming and manual labor occupations had significantly lower productivity losses compared to professionals. See Table S5.

**Supplementary Table S5: Testing for differences in productivity losses by participant characteristics.**

| **Characteristics** | **Observations** | **Rank sum** | **P-value** |
| --- | --- | --- | --- |
| **Current Age**  Less than 20 years  20-29 years  30-39 years  40-49 years  50-59 years  60 years and above | 14  22  48  31  24  11 | 1334.00  1921.00  3646.50  2634.00  1336.50  453.00 | **0.003**** |
| **Gender**  Female  Male | 68  82 | 5490.50  5834.50 | 0.178 |
| **Occupation**  Farming  Professional  Sales and services  Manual labour  Others (motorcycle riders) | 21  8  16  5  1 | 477.00  68.00  267.00  37.00  477.00 | **0.020*** |
| **Social economic status**  Poorest  Poor  Middle  Wealthy  Wealthiest | 11  16  5  14  5 | 192.00  450.00  218.00  362.50  103.50 | **0.020*** |
| **Severity of event**  Non-severe  Non-severe (OPD)  Severe (IPD) | 48  1  2 | 87.00  37.00  1202.00 | 0.172 |
| **Type of hospital visit**  Outpatient  In-patient | 15  36 | 540.00  786.00 | **0.002**** |
| **Source of income**  Earnings  Donations  Savings | 49  2  0 | 1295.00  31.00  0.00 | 0.308 |
| **Residence**  Rural  Urban | 138  12 | 10187  1138 | 0.108 |

**Differences in treatment costs and for snakebites envenoming by patient socio demographic and economic characteristics**

The study tested for differences in hospital costs by participant characteristics. Significant results were observed for occupation and social economic status with p-values of 0.002 and 0.003, respectively. Type of hospital visit was also significantly associated with hospital costs with a p-value of <0.001. No significant differences were observed for age, gender, severity of event, source of income, and residence. See Table S6.

**Supplementary Table S*6*: Testing for differences in hospital costs by participant characteristics**

| **Characteristics** | **Observations** | **Rank sum** | **P-value** |
| --- | --- | --- | --- |
| **Current Age**  Less than 20 years  20-29 years  30-39 years  40-49 years  50-59 years  60 years and above | 4  9  17  9  9  3 | 112.00  247.00  430.00  270.00  225.00  42.00 | 0.723 |
| **Gender**  Female  Male | 26  25 | 596  730 | 0.131 |
| **Occupation**  Farming  Professional  Sales and services  Manual labour  Others | 64  33  43  6  4 | 3874.50  2587.00  4101.00  522.50  240.00 | **0.002**** |
| **Social economic status**  Poorest  Poor  Middle  Wealthy  Wealthiest | 47  41  12  36  14 | 2591.00  3512.50  1069.00  3078.00  1074.50 | **0.003**** |
| **Severity of event**  Non-severe  Non-severe (OPD)  Severe (IPD) | 137  11  2 | 10121.00  638.00  267.00 | 0.143 |
| **Type of hospital visit**  Outpatient  In-patient | 113  17 | 9370.50  1655.50 | **<0.001***** |
| **Source of income**  Earnings  Donations  Savings | 145  4  1 | 11074.00  164.00  87.00 | 0.265 |
| **Residence**  Rural  Urban | 45  6 | 1183.50  142.50 | 0.693 |

## **Distribution of the economic burden of snakebites envenoming by participant characteristics**

The study found that there are significant differences in the total costs of treatment by occupation, type of hospital visits and social economic status. The p-values for occupation, type of hospital visit and social economic status are 0.007, <0.001 and 0.013, respectively, indicating a statistically significant difference. However, there are no significant differences in the total costs of treatment by age, gender, severity of event, source of income for health payments, and residence, as their p-values are greater than 0.05. See Table S7.

**Supplementary Table S7: Testing for differences in Total Costs of treatment-overall by participant characteristics**

| **Characteristics** | **Observations** | **Rank sum** | **P-value** |
| --- | --- | --- | --- |
| **Current Age**  Less than 20 years  20-29 years  30-39 years  40-49 years  50-59 years  60 years and above | 14  22  48  31  24  11 | 1251.00  1937.00  3653.50  2444.50  1524.00  515.00 | 0.073 |
| **Gender**  Female  Male | 68  82 | 5519.50  5805.50 | 0.145 |
| **Occupation**  Farming  Professional  Sales and services  Manual labour  Others (motorcycle riders) | 64  33  43  6  4 | 4125.00  2426.00  3926.50  625.50  278.50 | **0.007**** |
| **Social economic status**  Poorest  Poor  Middle  Wealthy  Wealthiest | 47  41  12  36  14 | 2679.00  3443.50  1076.00  2992.50  1134.00 | **0.013*** |
| **Severity of event**  Non-severe  Non-severe (OPD)  Severe (IPD) | 137  11  2 | 10185.00  560.00  281.00 | 0.064 |
| **Type of hospital visit**  Outpatient  In-patient | 113  17 | 1933.50  9092.50 | **<0.001***** |
| **Source of income for health payments**  Earnings  Donations  Savings | 145  4  1 | 11026.00  225.00  74.00 | 0.667 |
| **Residence**  Rural  Urban | 138  12 | 10214  1111 | 0.155 |

### **Catastrophic health expenditures related to the incident of a snake bite by asset quintile using 40% threshold**

The percentage distribution of households across different wealth quintiles in relation to catastrophic health expenditures and non-catastrophic health expenditures in the event of a snake bite was calculated. Among the thresholds used, a household was determined to have experienced CHE if it spent more than 40% of its monthly expenditures without food on the event.

Overall, 31.4% of households in the sample experienced CHE, while 68.6% did not. Among households that experienced CHE, the highest proportion (33.3%) was in the "Poor" quintile, followed by the "Poorest" (24.5%), "Wealthy" (22.2%), "Middle" (11.1%), and "Wealthiest" (8.9%) quintiles. Among households that did not experience CHE, the highest proportion (34.3%) was in the "Poorest" quintile, followed by the "Wealthy" (24.8%), "No CHE" (24.8%), "Poor" (24.8%), and "Wealthiest" (9.5%) quintiles. See Figure 4.

**Figure 4: Catastrophic health expenditures related to the incident of a snake bite by asset quintile using 40% threshold**

### Catastrophic health expenditures related to the incident of a snake bite by asset quintile using 25% threshold

The percentage distribution of households across different wealth quintiles in relation to experiencing catastrophic health expenditures or not experiencing catastrophic health expenditures in the event of a snake bite for 25% threshold. A household was said to have experienced catastrophic health expenditures if it spent more than 25% of its monthly expenditures on the event.

Overall, 26.4% of households in the sample experienced catastrophic health expenditures, while 73.6% did not. Among households that experienced catastrophic health expenditures, the highest proportion (29.03%) was in the "Poor" quintile, followed by the "Wealthy" (25.81%), "Poorest" (19.35%), "Middle" (16.13%), and "Wealthiest" (9.68%) quintiles. Among households that did not experience catastrophic health expenditures, the highest proportion (34.45%) was in the "Poorest" quintile, followed by the "Poor" (26.89%), "Wealthy" (23.53%), "Not Cat" (23.53%), and "Wealthiest" (9.24%) quintiles. See Figure 5.

**Figure 5: Catastrophic health expenditures related to the incident of a snake bite by asset quintile using 25% threshold**

### Catastrophic health expenditures related to the incident of a snake bite by asset quintile using 10% threshold

The percentage distribution of households across different wealth quintiles in relation to experiencing CHE or not experiencing CHE in the event of a snake bite for threshold of 10% was calculated. A household experienced catastrophic health expenditure if it spent more than 10% of its income on the event.

Overall, 24.3% of households in the sample experienced catastrophic health expenditures, while 75.7% did not. Among households that experienced catastrophic health expenditures, the highest proportion (32.87%) was in the "Poorest" quintile, followed by the "Poor" (28.67%), "Wealthy" (23.08%), "Middle" (8.39%), and "Wealthiest" (6.99%) quintiles. Among households that did not experience catastrophic health expenditures, the highest proportion (57.14%) was in the "Wealthiest" quintile, followed by the "Wealthy" (42.86%), "No CHE" (0%), "Middle" (0%), "Poor" (0%), and "Poorest" (0%) quintiles. See Figure 6.

**Figure 6: Catastrophic health expenditures related to the incident of a snake bite by asset quintile using 10% threshold**

**Costs incurred by the snakebite victims**

We analysed and categorized the mean costs into hospital and traditional costs. Hospital costs included hospitalization/bed costs, medication and drug costs, travel costs, meal and food costs, and other non-medical costs while traditional costs included traditional medications and remedies costs. The study found that hospital costs for medications and drugs were higher than traditional costs, while traditional costs were higher for travel and other non-medical costs. The total time loss for caregivers was higher for hospital costs than for traditional costs. The total overall cost, which includes both direct and indirect costs, was UGX 10,611,000 for hospital costs and UGX 10,041,056 for traditional costs. See Supplementary Table S8 below.

**Supplementary Table S8****: Mean costs for Victims by number of visits and access to treatment site**

|  | **Type of cost** | **Hospital costs (UGX)** | **Traditional costs (UGX)** |
| --- | --- | --- | --- |
| **Visit One**  **1** | Medications and drugs costs**4** | 17,067 | 32,476 |
| Hospitalization/bed costs | 12,013 | 0 |
| Travel costs | 14,273 | 32,452 |
| Meal and food costs | 8,500 | 12,233 |
| Other non-medical costs2 | 100 | 5,500 |
| **Visit one total costs** |  |  |
| **Visit two**  **1** | Medications and drugs costs**4** | 24,400 | 18,000 |
| Hospitalization/bed costs | 12,000 | 0 |
| Travel costs | 633 | 14,560 |
| Meal and food costs | 2,400 | 5,566 |
| Other non-medical costs2 | 0 | 4,550 |
| **Visit two total costs** |  |  |
| **Visit three**  **1** | Medications and drugs costs**4** | 0 | 1633 |
| Hospitalization/bed costs | 147 | 0 |
| Travel costs | 253 | 10,256 |
| Meal and food costs | 107 | 3,250 |
| Other non-medical costs2 | 100 | 3,340 |
| **Visit three total costs** |  |  |
| **Overall** | **Total direct cost** | 8,806,000 | 9,455,056 |
| **Total indirect cost**3 | 1,805,000 | 586,000 |
| **Total overall cost** | 10,611,000 | 10,041056 |
| **Total time loss** (in hours) | 112 | 52 |
| **Total first aid costs**  Productivity loses  Non-medical costs  Drugs costs at first aid  Travel | 998,000 (89.9)  36,000 (3.2)  70,000 (6.3)  6,016 (0.5) | |

1. Visits done for all visit made during the follow-up period made by study team
2. Other non-medical costs included; damp wash cloths (tepid sponge), traditional medicines, and bribes/ tokens for thanks
3. Indirect costs obtained from time loss for all caregivers (main and other) using human capital approach
4. Has traditional medications and remedies costs for the section of Traditional costs

**Significance of differences in treatment costs, productivity losses and total costs for snakebites by patient socio-demographic and economic characteristics**

The analysis revealed that occupation, socio-economic status, and type of hospital visit were the most consistent predictors of both direct and indirect costs in snakebite envenoming. Snakebite victim’s age was significantly related to productivity losses (p = 0.003) while gender, source of income and residence were not statistical significantly different across productivity losses, hospital and total costs. **Supplementary Table S9**. For each of the categories of costs detailed tables for costs were also detailed as: productivity losses (Table S5), treatment costs (Table S6), and total costs (Table S7).

**Supplementary Table S9:** **Differences in treatment costs, productivity losses and total costs for snakebites envenoming by patient socio-demographic and economic characteristics**

| **Characteristics** | **Productivity Losses** | **Hospital Costs** | **Total Cost** |
| --- | --- | --- | --- |
| Victim’s Age | **0.003**** | 0.723 | 0.073 |
| Gender | 0.178 | 0.131 | 0.145 |
| Occupation | **0.020*** | **0.002**** | **0.007**** |
| Social economic status | **0.020*** | **0.003**** | **0.013*** |
| Severity of event | 0.172 | 0.143 | 0.064 |
| Type of hospital visit | **0.002**** | **<0.001***** | **<0.001***** |
| Source of income | 0.308 | 0.265 | 0.667 |
| Residence | 0.108 | 0.693 | 0.155 |

*p<0.05 ** p<0.01 *** p<0.001

**Table 4: Multivariate logistic Regression for CHE thresholds for households that experienced snakebites events**

| **Variables** | **Experienced Catastrophic Health Expenditure thresholds** | | |
| --- | --- | --- | --- |
| **CHE at 10%** | **CHE at 25%** | **CHE at 40%** |
| AOR (95% CI) | AOR (95% CI) | AOR (95% CI) |
| **Age** | | | |
| Less than 30 years  30-49 years  50 years and above | 1  0.23(0.05-1.12)  0.39(0.07-2.40) | 1  **0.15(0.02-1.00) ***  0.69(0.10-4.57) | NI  NI  NI |
| **Sex of the household held** | | | |
| Male  Female | 1  **3.7(1.21-11.16) *** | 1  0.49(0.13-1.89) | 1  0.54 (0.10-2.84) |
| **Residence** | | | |
| Rural  Urban | 1  3.32(0.53-20.68) | 1  3.9(0.72-21.08) | 1  0.68(0.06-8.27) |
| **Primary occupation of the household head** | | | |
| Manual labour  Professional  Sales and services | 1  0.05(0.006-0.43)  **0.04(0.005-0.38) *** | 1  6.4(0.61-66.82)  **12.9(1.23-136.50) *** | 1  3.20(0.19-52.66)  1.50(0.15-15.41) |
| **Number of household members** | | | |
| 1-2 members  3-5 members  6-10 members  Above 10 members | 1  3.50(0.19-62.29)  3.15(0.16-61.42)  0.24(0.005-10.44) | 1  0.61(0.01-32.40)  2.43(0.04-155.87)  0.79(0.009-63.98) | NI  NI  NI  NI |
| **Traditional Remedy** | | | |
| No  Yes | 1  **0.01 (0.002-0.06) ***** | 1  **0.04(0.008-0.171) ***** | 1  0.62(0.09-4.34) |
| **Monthly expenditure** | | | |
| Less than 150,000/=  150,000 - 300,000/=  300,000 and above | 1  1.07(0.0004-28.5)  1.54(0.0006-38.3) | 1  3.26(0.076-139.8)  0.45(0.012-16.79) | NI  NI  NI |
| **Visit Type** | | | |
| Inpatient  Outpatient | NI  NI | 1  **0.03(0.002-0.29) *** | 1  0.75(0.66-8.47) |
| **Went to Hospital** | | | |
| Inpatient  Outpatient | NI  NI | NI  NI | 1  0.17(0.03-1.17) |

NI: Not Included in the model. Level of significance p<0.05*; <0.01**; <0.001***

### **Costs incurred by the snakebite victims**

We analysed and categorized the mean costs into hospital and traditional costs. Hospital costs included hospitalization/bed costs, medication and drug costs, travel costs, meal and food costs, and other non-medical costs while traditional costs included traditional medications and remedies costs. The study found that hospital costs for medications and drugs were higher than traditional costs, while traditional costs were higher for travel and other non-medical costs. The total time loss for caregivers was higher for hospital costs than for traditional costs. See Supplementary Table S8. In this multivariable OLS model explaining variation in the overall snakebite costs, several patient- and system-level factors emerged as significant predictors. Patients aged 30–49 years incurred UGX 92,411 less in mean costs compared to those under 30 (t = –2.36, p = 0.020), while those aged 50 years and above paid UGX 134,164 less (t = –3.12, p = 0.002), potentially reflecting lower antivenom dosing or simpler care protocols among older individuals. Female patients paid significantly less than males (–UGX 61,140; t = –2.16, p = 0.033), possibly due to differences in envenoming severity, care-seeking behavior, or billing practices. Patients in sales and service occupations faced UGX 94,059 higher costs than the reference group (t = 2.48, p = 0.014), while professionals did not differ significantly. Outpatient care was associated with a substantial cost reduction of UGX 183,439 relative to inpatient treatment (t = –3.66, p < 0.001), reinforcing the role of admission status as a primary cost driver. Treatment at hospitals, compared to lower-level health centers, increased mean costs by UGX 213,455 (t = 5.84, p < 0.001), likely due to higher facility fees, diagnostics, and overheads. Household size was inversely associated with cost: households with 3–5 members paid UGX 287,075 less (t = –3.97, p < 0.001), those with 6–10 members paid UGX 282,828 less (t = –3.72, p < 0.001), and households with more than 10 members paid UGX 215,733 less (t = –2.73, p = 0.007), suggesting possible cost-sharing or negotiated billing among larger families. Other covariates—including urban residence, traditional healer use, income category, and clinical severity—were not significantly associated with cost. The slope index of inequity (SII) was small and non-significant (–UGX 148; t = –0.39, p = 0.694), indicating that, after adjustment, wealth rank alone did not predict treatment costs. See Table 8.

**Table 8:** **Linear regression of OverallCosts**

| Predictor | Coefficient (SE) | t | p |
| --- | --- | --- | --- |
| Slope Index of Inequity (rankvar) | –148.38 (376.82) | –0.39 | 0.694 |
|  |  |  |  |
| Age: 30–49 vs <30 yrs | –92,411.18 (39,135.23) | –2.36 | 0.020* |
| Age: ≥50 vs <30 yrs | –134,164.00 (43,031.12) | –3.12 | 0.002** |
|  |  |  |  |
| Female vs Male | –61,139.61 (28,325.79) | –2.16 | 0.033* |
|  |  |  |  |
| Urban vs Rural | –15,450.95 (47,018.45) | –0.33 | 0.743 |
|  |  |  |  |
| Occupation: Professional vs Ref. | 55,218.73 (40,261.07) | 1.37 | 0.173 |
| Occupation: Sales & services vs Ref. | 94,059.04 (37,938.78) | 2.48 | 0.014* |
|  |  |  |  |
| Visit type: Outpatient vs Inpatient | –183,439.20 (50,178.31) | –3.66 | <0.001** |
|  |  |  |  |
| Went to hospital: Yes vs No | 213,454.50 (36,524.99) | 5.84 | <0.001** |
|  |  |  |  |
| Family size: 3–5 vs ≤2 members | –287,075.00 (72,371.26) | –3.97 | <0.001** |
| Family size: 6–10 vs ≤2 members | –282,827.60 (75,973.10) | –3.72 | <0.001** |
| Family size: >10 vs ≤2 members | –215,733.40 (79,039.39) | –2.73 | 0.007** |
|  |  |  |  |
| Used traditional remedies: Yes vs No | 34,262.96 (41,725.11) | 0.82 | 0.413 |
|  |  |  |  |
| Income 50–<150 K vs <50 K | 191,140.40 (219,029.50) | 0.87 | 0.385 |
| Income 150–<300 K vs <50 K | 112,487.30 (159,071.10) | 0.71 | 0.481 |
| Income ≥300 K vs <50 K | 112,369.70 (156,807.50) | 0.72 | 0.475 |
|  |  |  |  |
| Severity: OPD non-severe vs Severe | –122,457.90 (128,572.30) | –0.95 | 0.343 |

Notes: Coefficient (standard error). p < .05; ** p < .01; *** p < .001. Model: OLS; N = 145; R² = 0.5595; Adj R² = 0.4965.
